# Supplementary material
Source: PubMed Central journal article supplement (PMC4504802)
Supplement: NIHMS675657-supplement-sup_table_1.pdf [file NIHMS675657-supplement-sup_table_1.pdf]

**Table S1.** A summary of eighteen studies administering propranolol in humans.

| 1 <sup>st</sup> Auth. & Year of Pub. | Dose                         | N w/ drug | N male | Mean Age | Weight/ BMI                  | Test for dose?         | Paradigm                                                  | Rough Findings                                                                                                          |
|--------------------------------------|------------------------------|-----------|--------|----------|------------------------------|------------------------|-----------------------------------------------------------|-------------------------------------------------------------------------------------------------------------------------|
| Cahill 1994                          | 40mg                         | 20        | ~9?    | 27.4     | -                            | -                      | Drug at encoding for later memory test of story.          | Propranolol eliminated benefit to memory from emotional content.                                                        |
| Currie 1988                          | 40, 80, & 160mg on sep. days | 12        | 12     | (19-29)  | -                            | Indirectly; No effect. | Cognitive tests.                                          | Propranolol reduced the # of photos recalled, and reduced anxiety after drug.                                           |
| van Stegeren 1998                    | 40mg                         | 25        | ~8     | (18-22)  | -                            | -                      | Story memory paradigm.                                    | Propranolol eliminated effect of emotion in improving recall & recognition for the emotional story only.                |
| Harmer 2001                          | 80mg                         | 10        | 5      | 27.7     | -                            | -                      | Emotion recognition paradigm.                             | Propranolol sped up reaction times to sad faces.                                                                        |
| Reist 2001                           | 40mg                         | 20        | 20     | ~45      | -                            | Directly; No effect.   | Emotional story memory.                                   | Propranolol reduced everyone's recall of emotional story, not neutral.                                                  |
| Pitman 2002                          | 40mg x 4/day x 10 days       | 11-18     | ~8?    | 34.3     | -                            | -                      | Administered to emergency department patients.            | Propranolol reduced PTSD-associated symptoms.                                                                           |
| Strange 2003                         | 40mg                         | 12        | 6      | 24.5     | -                            | -                      | Word memory task.                                         | Emotional words impair memory for prev. non-emotional word. Propranolol eliminates the effect, as does amygdala damage. |
| Vaiva 2003                           | 40mg x 3/day x 7 days        | 11        | 7      | 23.9     | -                            | -                      | Administered to emergency department patients.            | Propranolol reduced the incidence of PTSD after a traumatic event.                                                      |
| Strange 2004                         | 40mg                         | 12        | 6      | 24.7     | -                            | -                      | Memory task.                                              | Propranolol eliminates amygdala response at encoding and later hippocampal bump at retrieval.                           |
| Rogers 2004                          | 80mg                         | 15        | 6      | 20.07    | -                            | -                      | Decision task.                                            | Propranolol increased gambling in one type of trial.                                                                    |
| Maheu 2004                           | 40mg or 80mg                 | 25        | 25     | (19-36)  | -                            | Indirectly; Yes.       | Emotional story; declarative memory test.                 | 40mg didn't affect memory; 80mg impaired short & long-term memory for emotional material (but not neutral).             |
| van Stegeren 2005                    | 80mg                         | 30        | 15     | 20.93    | ~70kg                        | -                      | Emotional image watching.                                 | Propranolol reduced amygdala response to emotional images.                                                              |
| van Stegeren 2006                    | 80mg                         | 15        | 7      | 20.93    | -                            | -                      | Emotional image watching.                                 | Propranolol reduced salivary alpha amylase production in response to emotional images.                                  |
| Brunet 2008                          | 40mg + 60mg x 2              | 9         | 5      | 34.8     | -                            | -                      | PTSD patients recalling memories, then reading script.    | Propranolol reduced physiological reactions to the highly arousing reliving of their PTSD-related story                 |
| De Martino 2008                      | 40mg                         | 38        | 19     | ~24      | -                            | -                      | Attentional blink w/ neutral and emotional items.         | Propranolol reduces attentional blink effect regardless of target valence.                                              |
| Zhang 2011                           | 40mg                         | 58-60     | 58-60  | (20-40)  | -                            | -                      | Iowa Gambling task in formerly heroin-dependent patients. | Propranolol blocked the negative effects of stress in worsening Iowa Gambling Task performance.                         |
| Schwabe 2011                         | 40mg                         | 34        | ~17?   | 24.3     | 22.8 (0.3) kg/m <sup>2</sup> | -                      | Stress & choice-after-devaluation paradigm.               | Stress made participants devaluation-insensitive; propranolol abolished the effect.                                     |
| Terbeck 2012                         | 40mg                         | 18        | 9      | 22.33    | -                            | -                      | IAT.                                                      | Attenuated implicit racial bias.                                                                                        |
