# Supplementary material
Source: PubMed Central journal article supplement (PMC4504802)

Estimated Transformed BMI

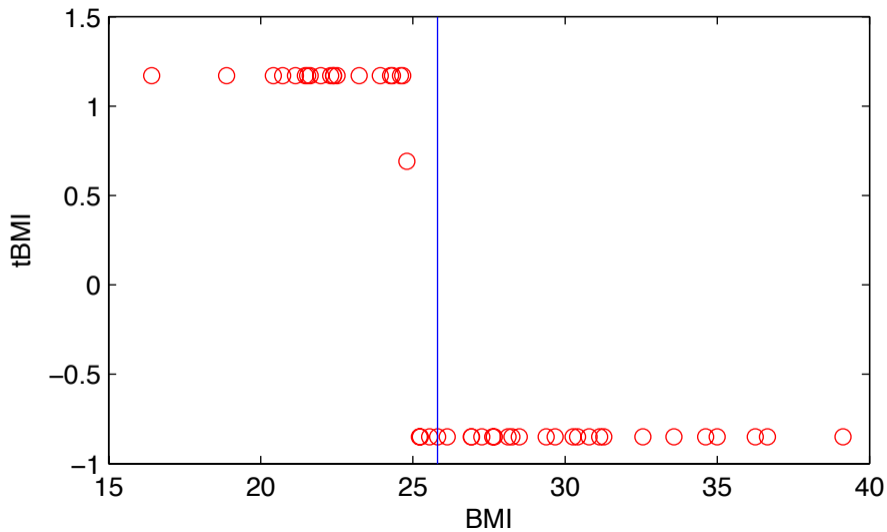

Supplement: NIHMS675657-supplement-sub_figure_1.pdf [file NIHMS675657-supplement-sub_figure_1.pdf]
